# Supplementary material for: Synthesis of an MXene supported Co nanoparticle catalyst for efficient catalytic transfer hydrogenation of nitro compounds with formic acid
Source: Royal Society of Chemistry journal article supplement (doi:10.1039/d3nj05864f), 2024-01-01

## **Electronic Supplementary Information**

**Synthesis of MXene supported Co nanoparticle catalyst for efficient catalytic transfer hydrogenation of nitro compounds with formic acid**

Mingyuan Jian, Kecan Dou, Deqiong Xie, Gaomei Tu, Weidong Zhu, Fumin Zhang\*

Key Laboratory of the Ministry of Education for Advanced Catalysis Materials, Institute of Physical Chemistry, Zhejiang Normal University, Jinhua 321004, People's Republic of China

**Corresponding Author:**

Fumin Zhang: [zhangfumin@zjnu.edu.cn](mailto:zhangfumin@zjnu.edu.cn)

**Table S1** Co content and textural properties of the various catalysts.

| <b>Catalyst</b> | <b>Co content (%)<sup>a</sup></b> | <b>S<sub>BET</sub> (m<sup>2</sup>/g)<sup>b</sup></b> | <b>V<sub>total</sub> (cm<sup>3</sup>/g)</b> |
|-----------------|-----------------------------------|------------------------------------------------------|---------------------------------------------|
| NC/MXene        | -                                 | 313.1                                                | 0.25                                        |
| 2.6% Co/MXene   | 2.6                               | 252.3                                                | 0.21                                        |
| 33.0% Co/MXene  | 33.0                              | 84.8                                                 | 0.15                                        |
| 3.4% Co/NC      | 3.4                               | 515.7                                                | 0.31                                        |

<sup>a</sup>By ICP–AES method. <sup>b</sup>By BET method.

**Table S2** Element analysis results for the various samples analyzed by XPS.

| <b>Catalyst</b> | <b>Co (%)</b> | <b>C (%)</b> | <b>N (%)</b> | <b>O (%)</b> | <b>Ti (%)</b> |
|-----------------|---------------|--------------|--------------|--------------|---------------|
| NC/MXene        | -             | 82.3         | 3.4          | 9.8          | 4.5           |
| 2.6% Co/MXene   | 0.5           | 82.5         | 10.4         | 6.4          | 0.2           |
| 33.0% Co/MXene  | 1.9           | 79.4         | 5.4          | 10.7         | 2.6           |
| 3.4% Co/NC      | 0.6           | 84.6         | 8.3          | 6.5          | -             |

**Table S3** Catalytic performance of the various catalysts for the catalytic transfer hydrogenation of nitrobenzene with FA.

| Entry | Catalyst                                             | Conversion (%) | Selectivity (%) |
|-------|------------------------------------------------------|----------------|-----------------|
| 1     | Blank                                                | 0              | -               |
| 2     | 2.6% Co/MXene                                        | 100.0          | 99.9            |
| 3     | NC/MXene                                             | 4.0            | 100.0           |
| 4     | 33.0% Co/MXene                                       | 16.4           | 100.0           |
| 5     | 3.4% Co/NC                                           | 34.5           | 99.6            |
| 6     | MXene                                                | 0.3            | 100.0           |
| 7     | 3.0% Co <sub>im</sub> /MXene                         | 41.0           | 99.1            |
| 8     | Co(NO <sub>3</sub> ) <sub>2</sub> ·6H <sub>2</sub> O | 0.3            | 100.0           |

**Reaction conditions:** nitrobenzene (0.5 mmol), toluene (3 mL), catalyst (10 mg), time (4 h), temperature (100 °C), 10 equiv of HCOOH, N<sub>2</sub> atmosphere.

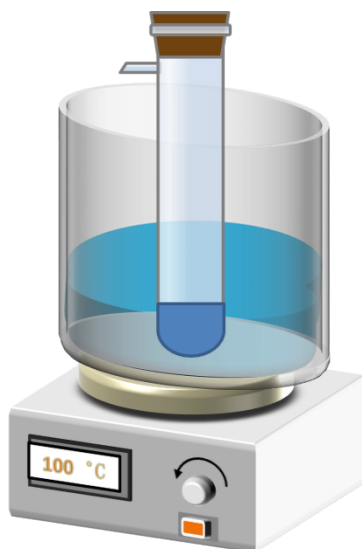

**Figure S1.** Schematic illustration of the experimental setup.

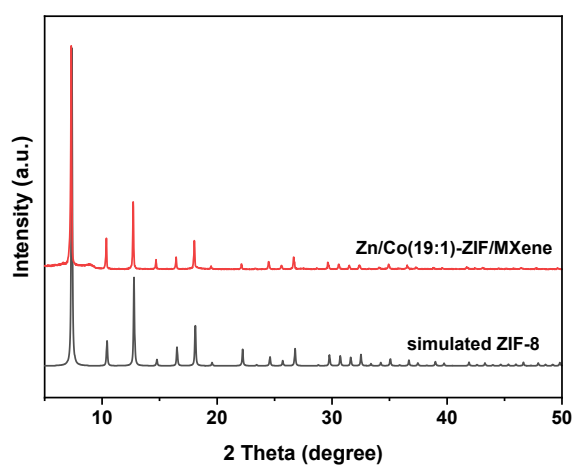

**Figure S2.** XRD patterns of simulated ZIF-8 and synthesized Zn/Co(19:1)-ZIF/MXene.

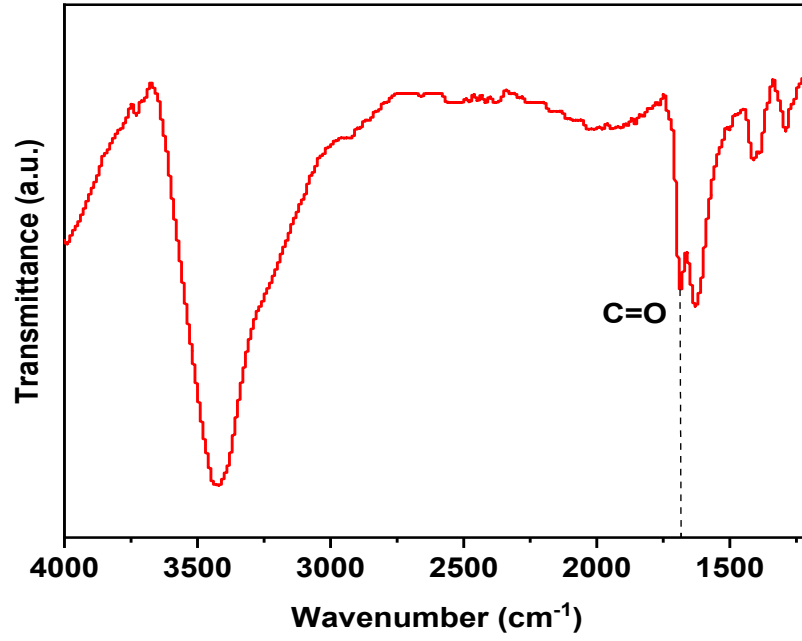

**Figure S3.** FT-IR spectrum of the carboxyl functionalized MXene.

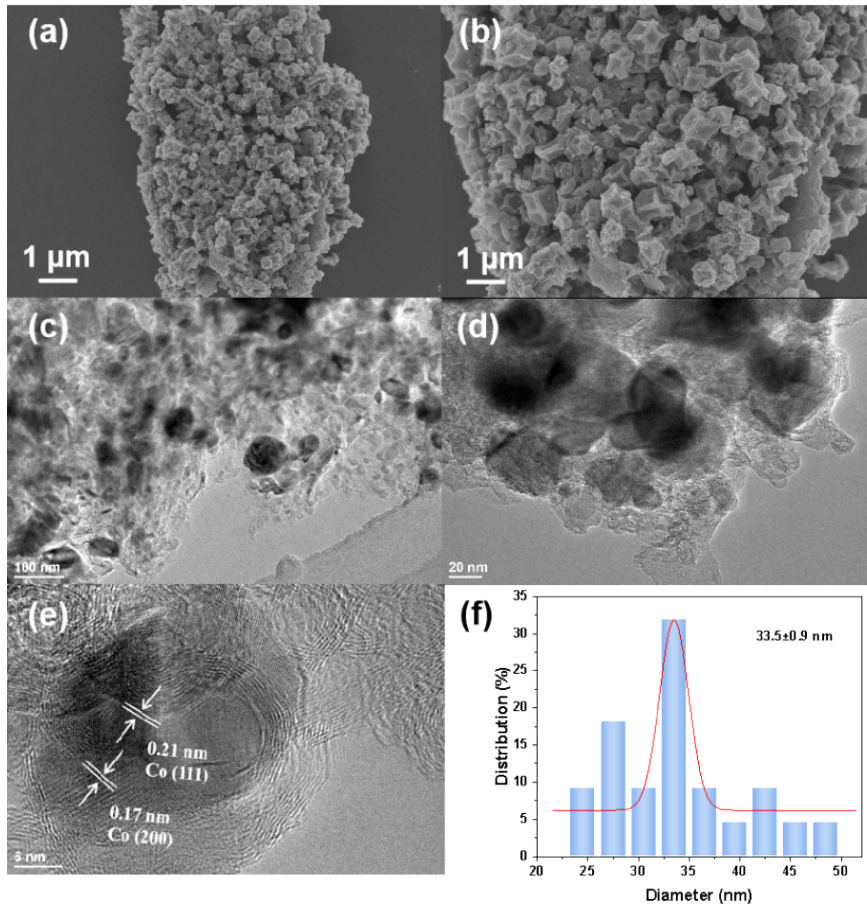

**Figure S4.** SEM and TEM images of 33.0% Co/MXene.

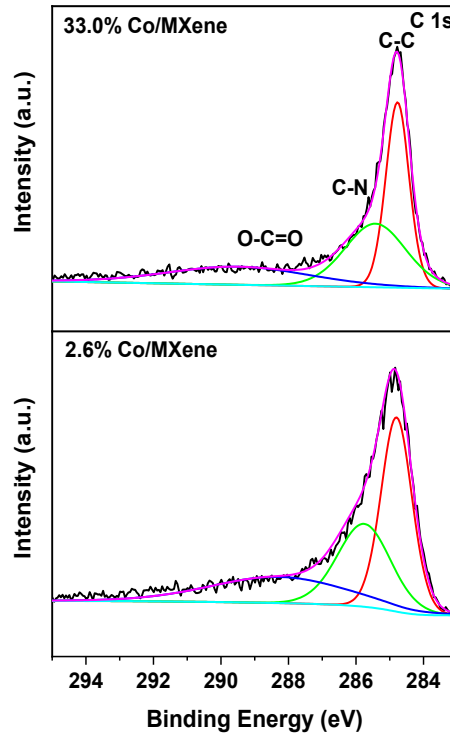

**Figure S5.** XPS spectra of C 1s region of 2.6% Co/MXene and 33.0% Co/MXene.

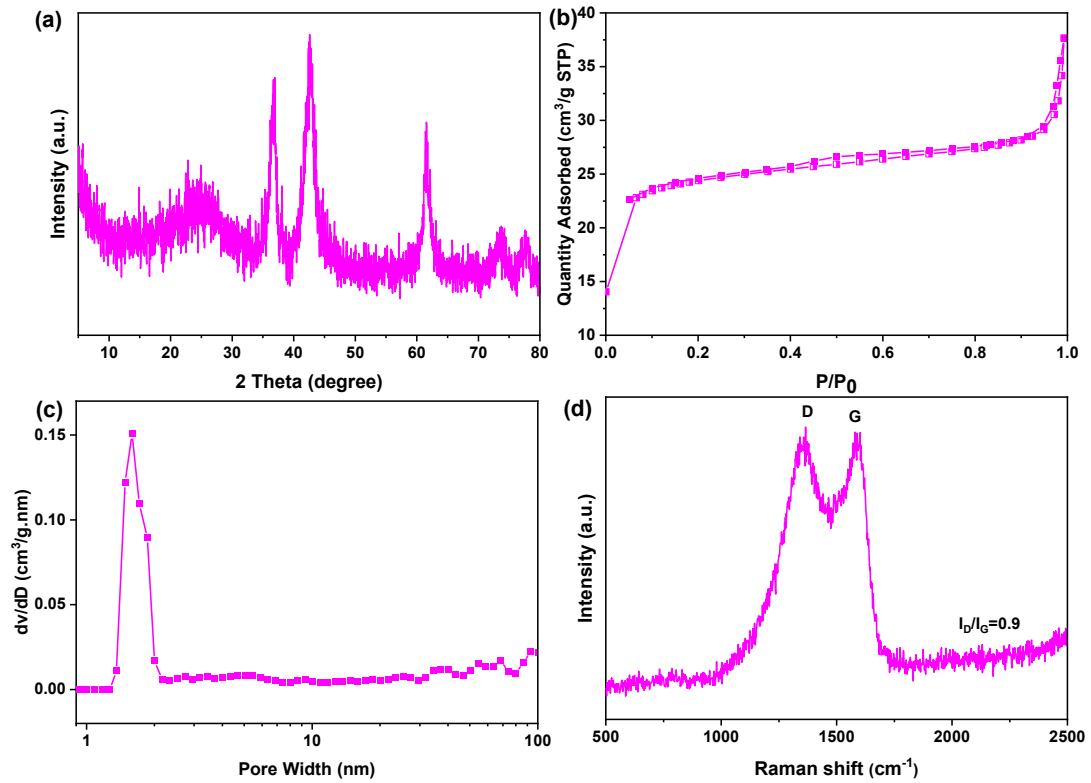

**Figure S6.** XRD pattern (a), N<sub>2</sub> adsorption–desorption isotherms (b), pore size distribution curve (c), and Raman spectrum (d) of 3.4% Co/NC.

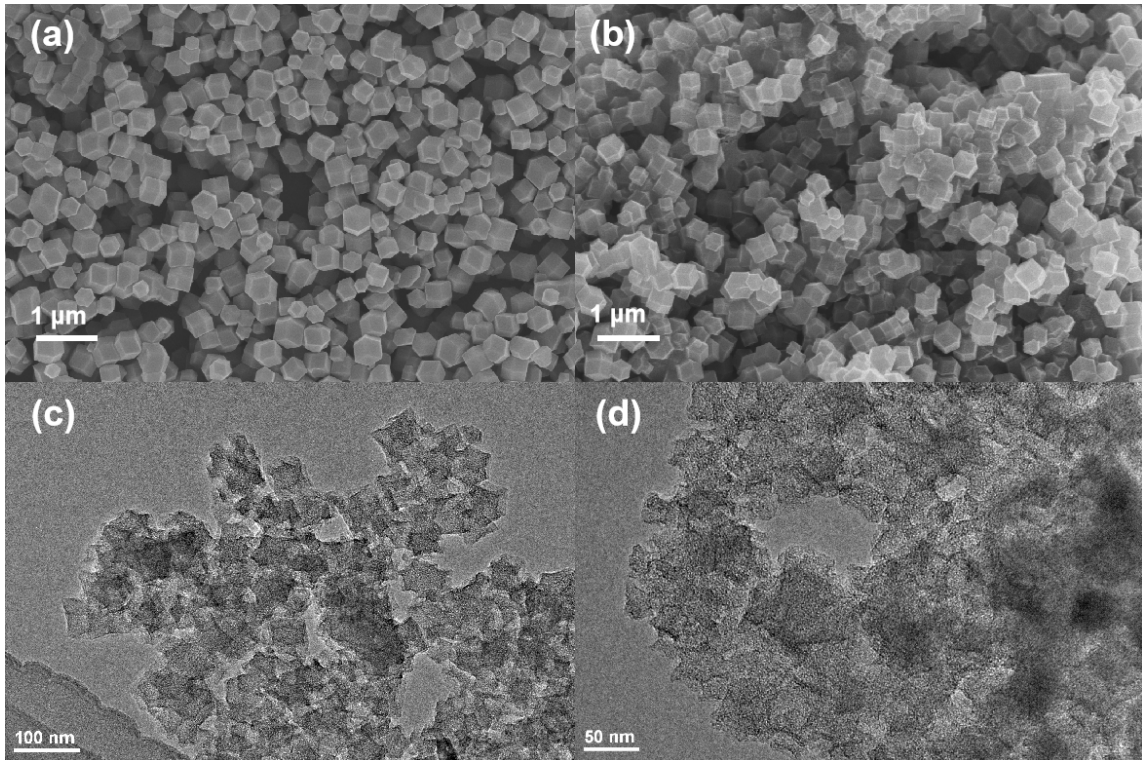

**Figure S7.** SEM and TEM images of 3.4% Co/NC.

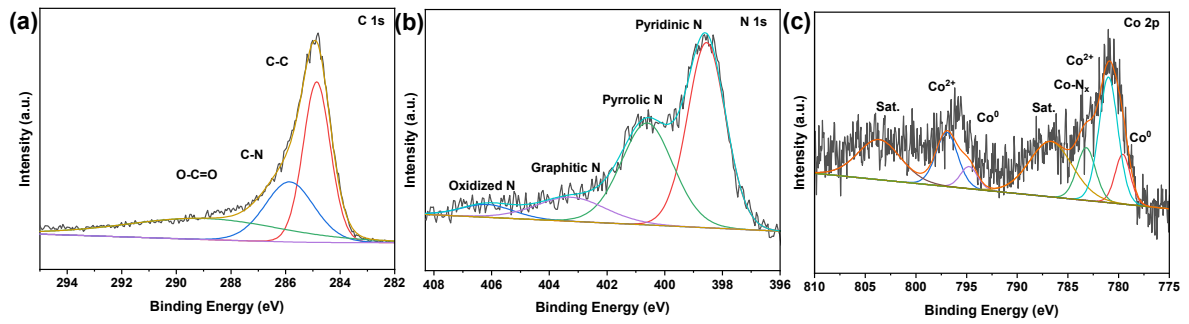

**Figure S8.** XPS spectra of 3.4% Co/NC.



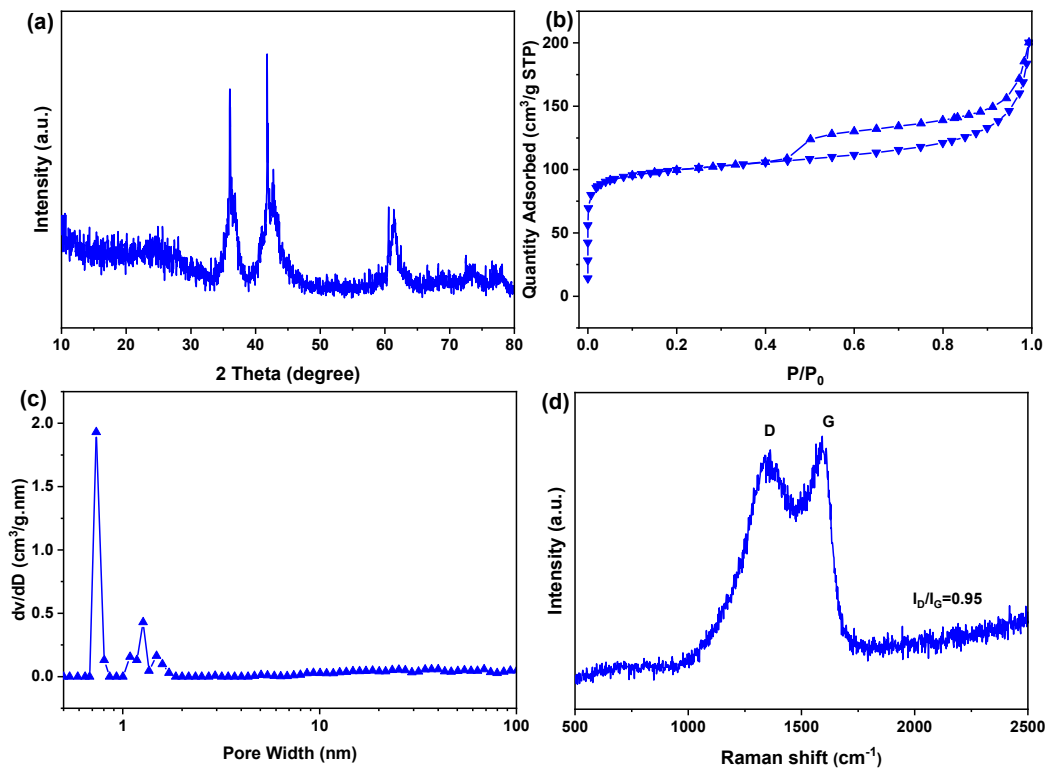

**Figure S9.** XRD pattern (a), N<sub>2</sub> adsorption–desorption isotherms (b), pore size distribution curve (c), and Raman spectra (d) of NC/MXene.

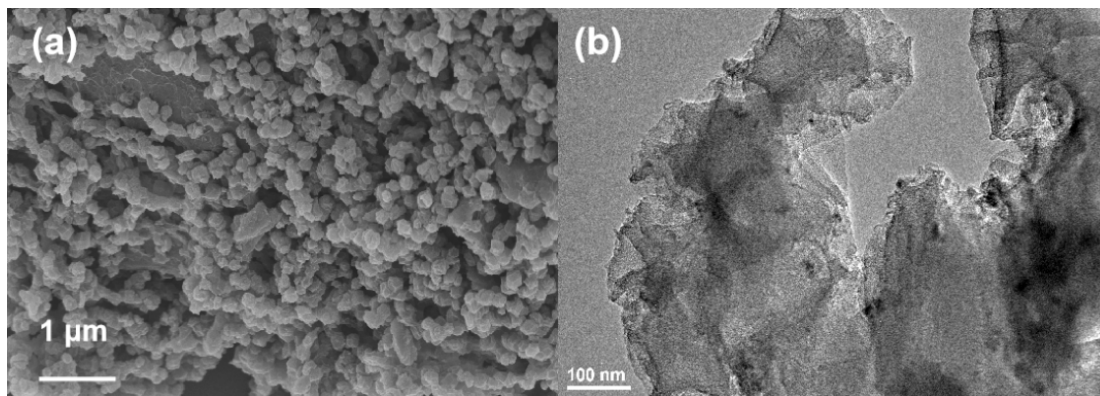

**Figure S10.** SEM and TEM images of NC/MXene.

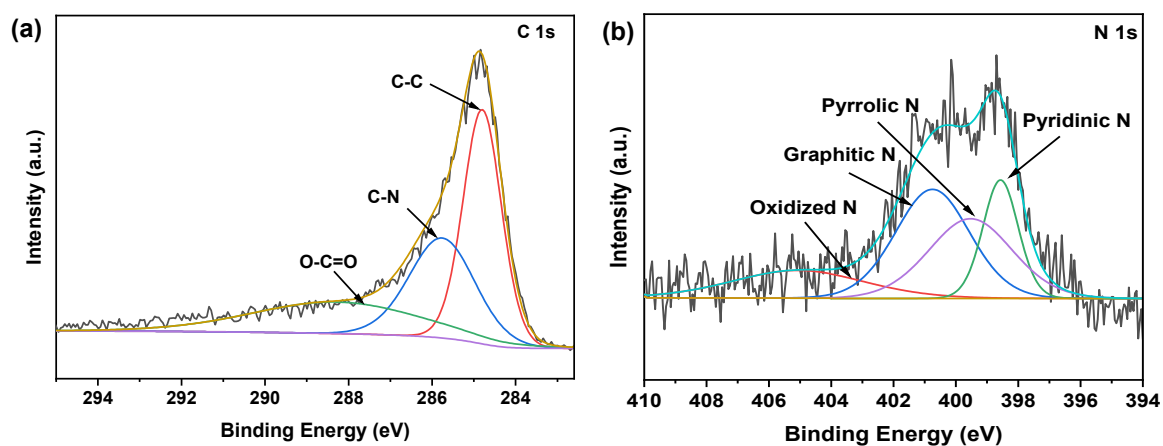

Figure S11. XPS spectra of NC/MXene.

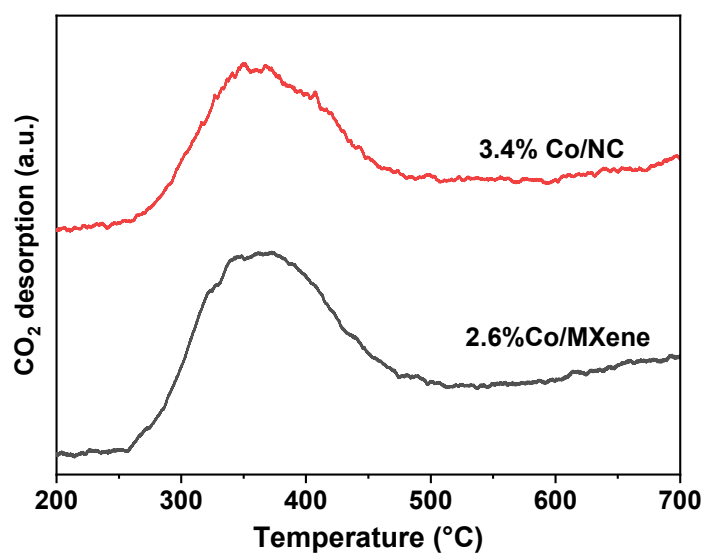

Figure S12. CO<sub>2</sub>-TPD profiles of 2.6% Co/MXene and 3.4% Co/NC.

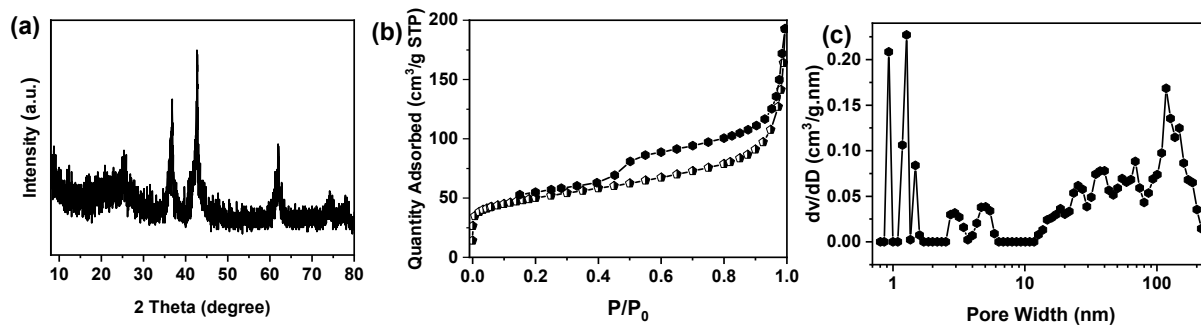

Figure S13. XRD pattern (a), N<sub>2</sub> adsorption-desorption isotherms (b), pore size distribution curve (c) of the spent 2.6% Co/MXene.

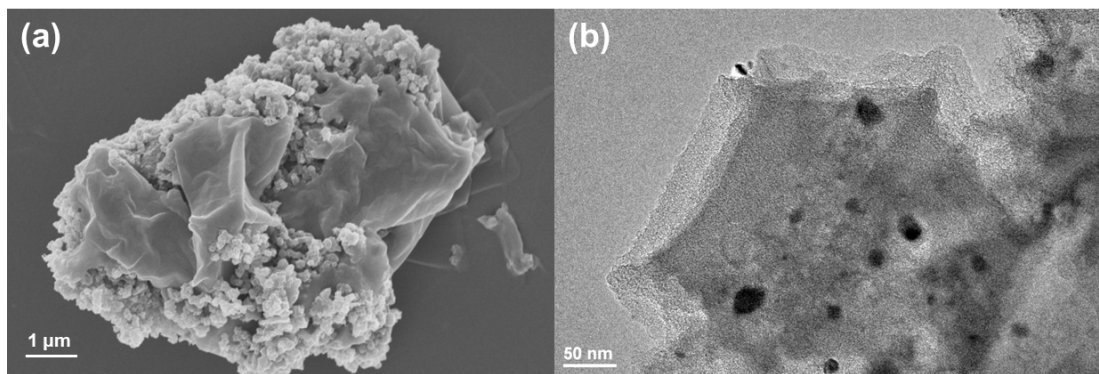

**Figure S14.** SEM and TEM images of the spent 2.6%Co/MXene.

## MS spectra of the typical products

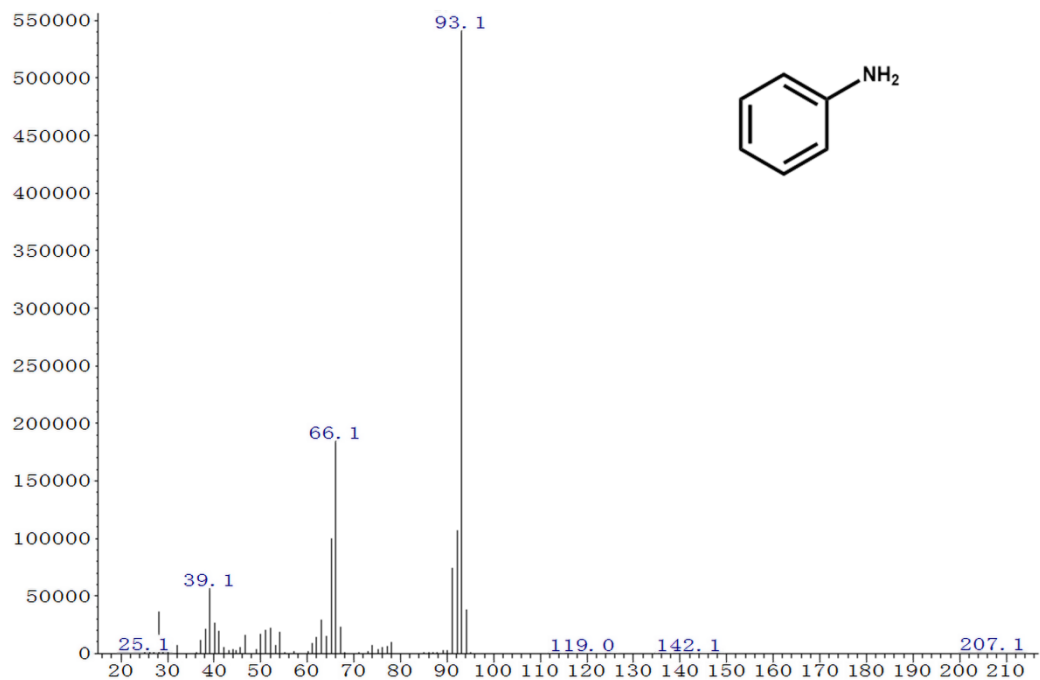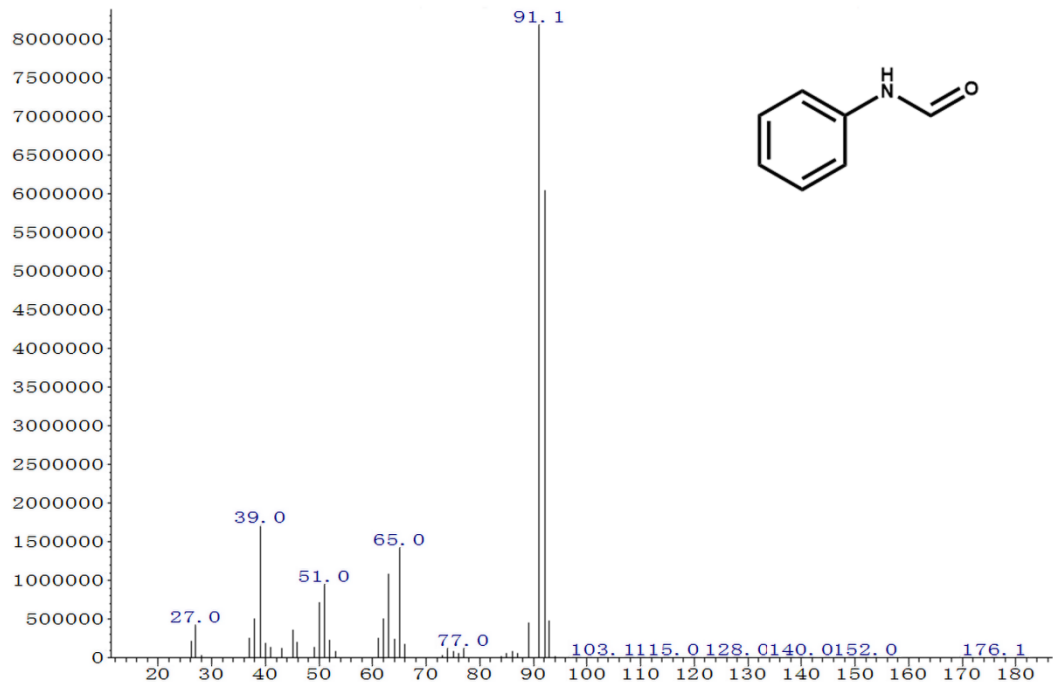

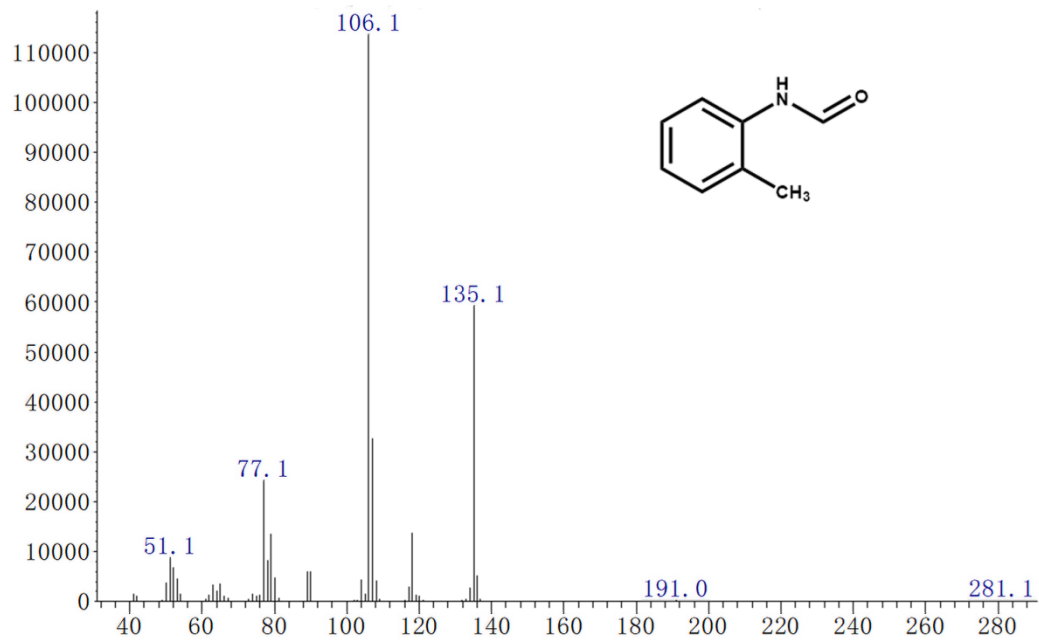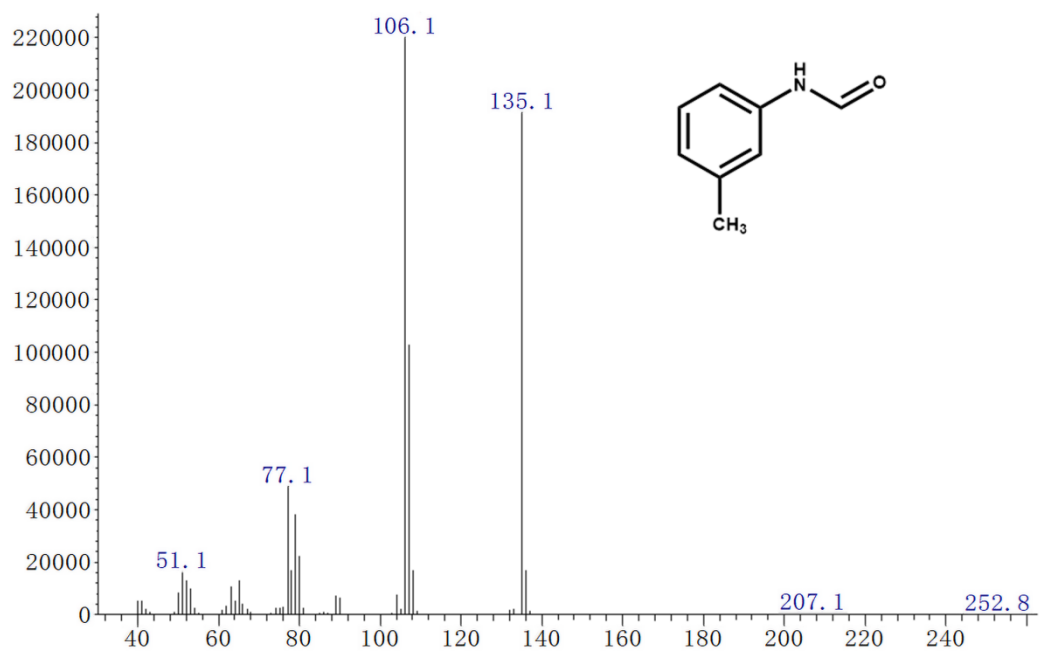

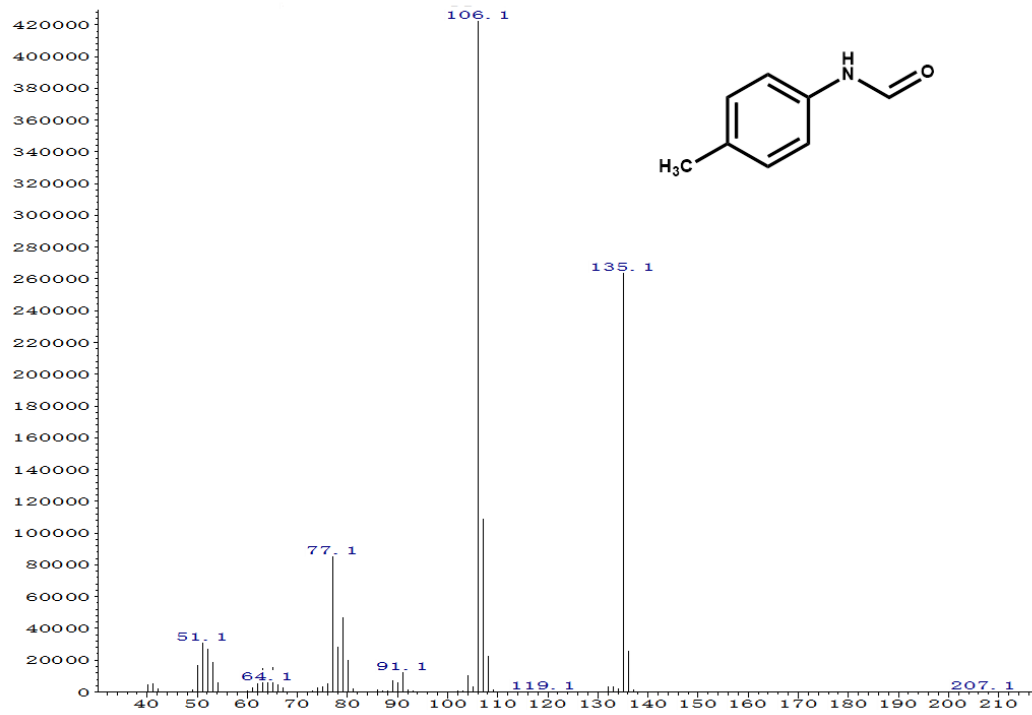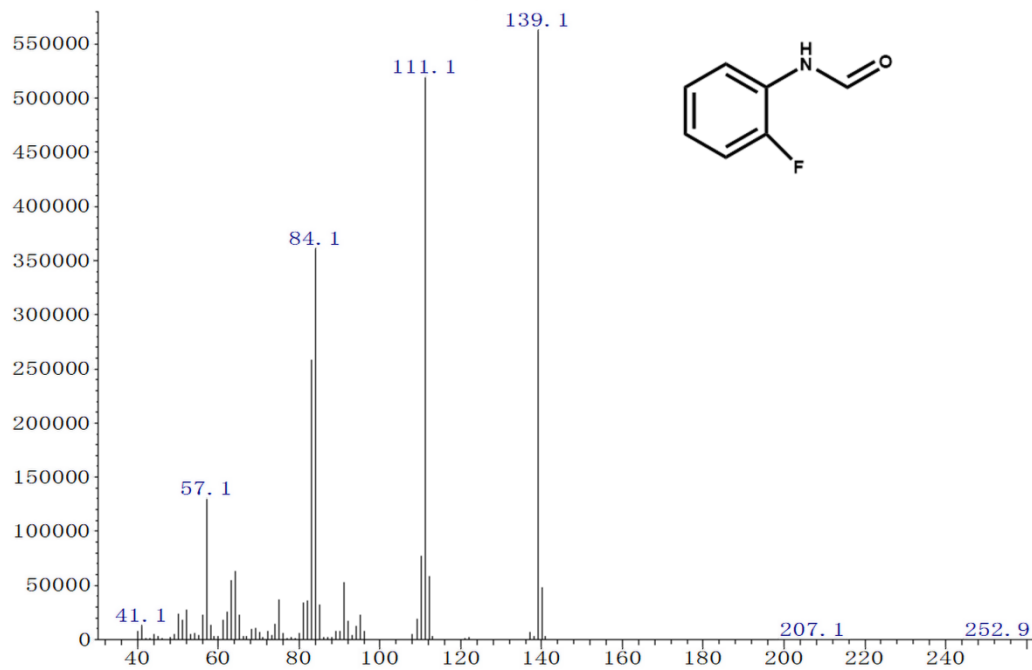

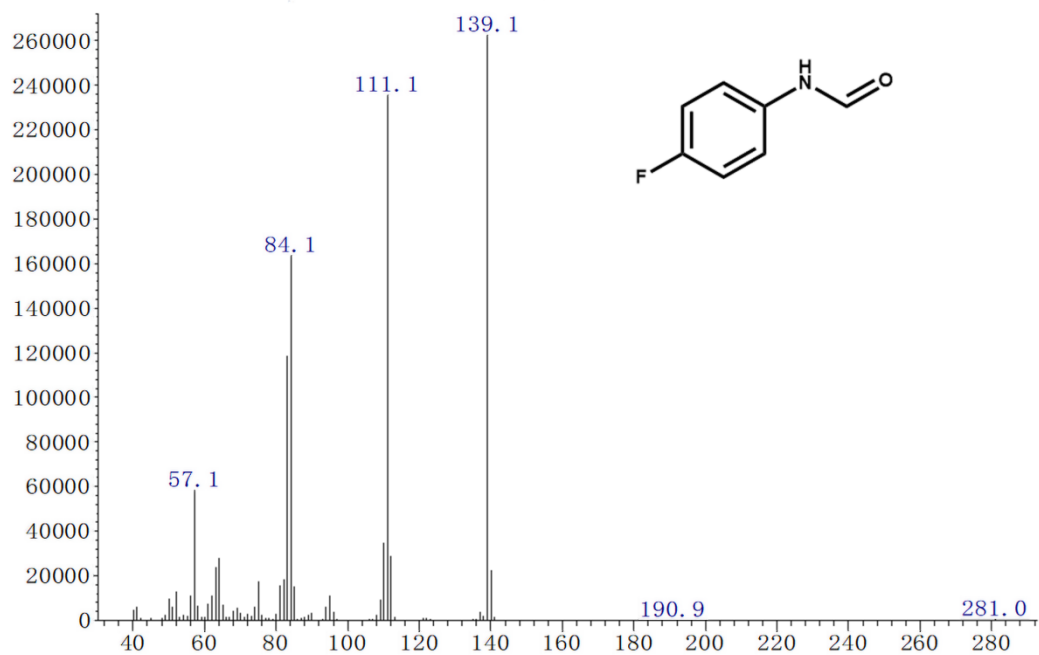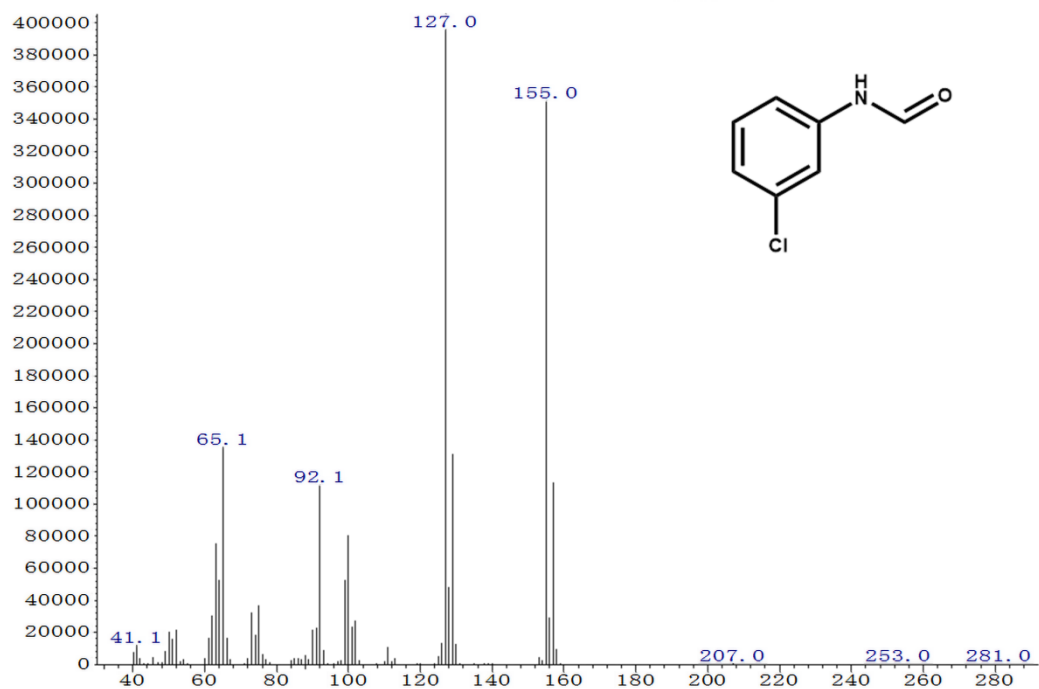

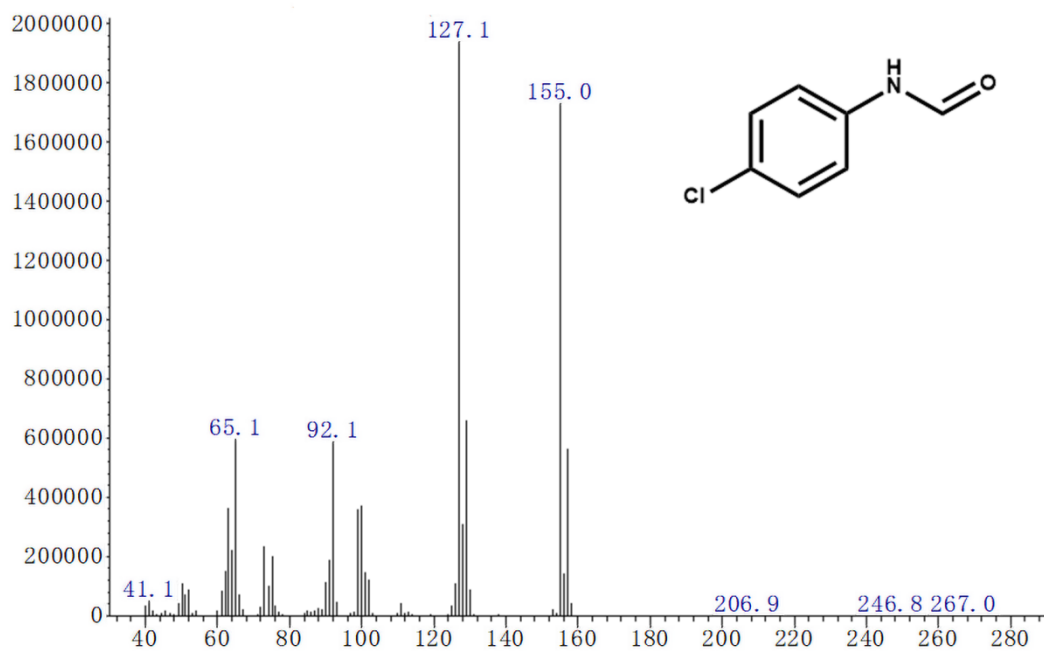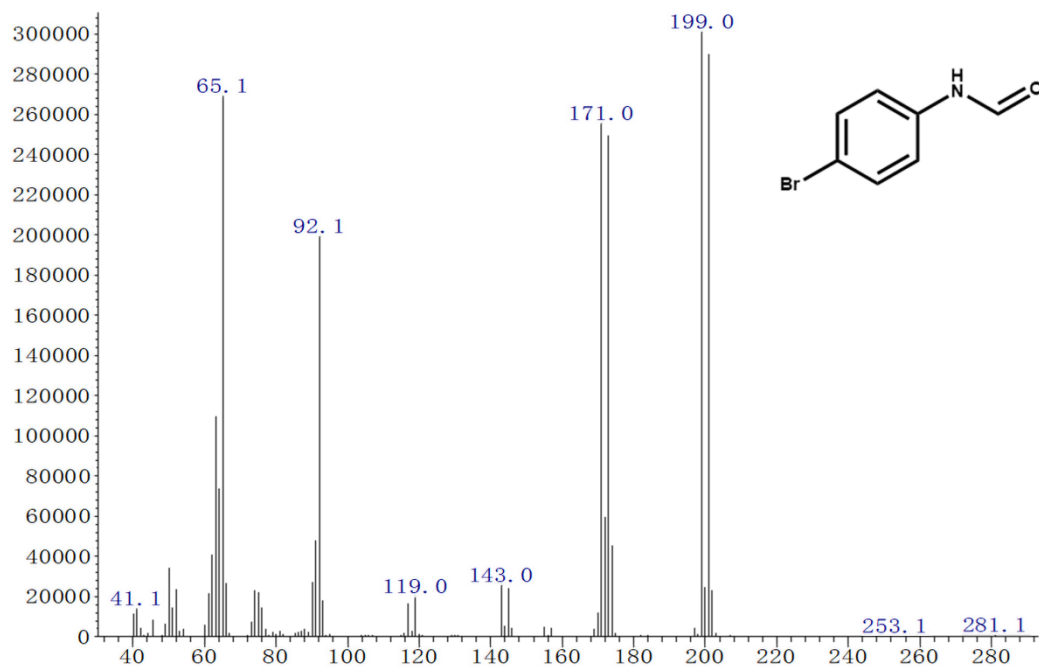



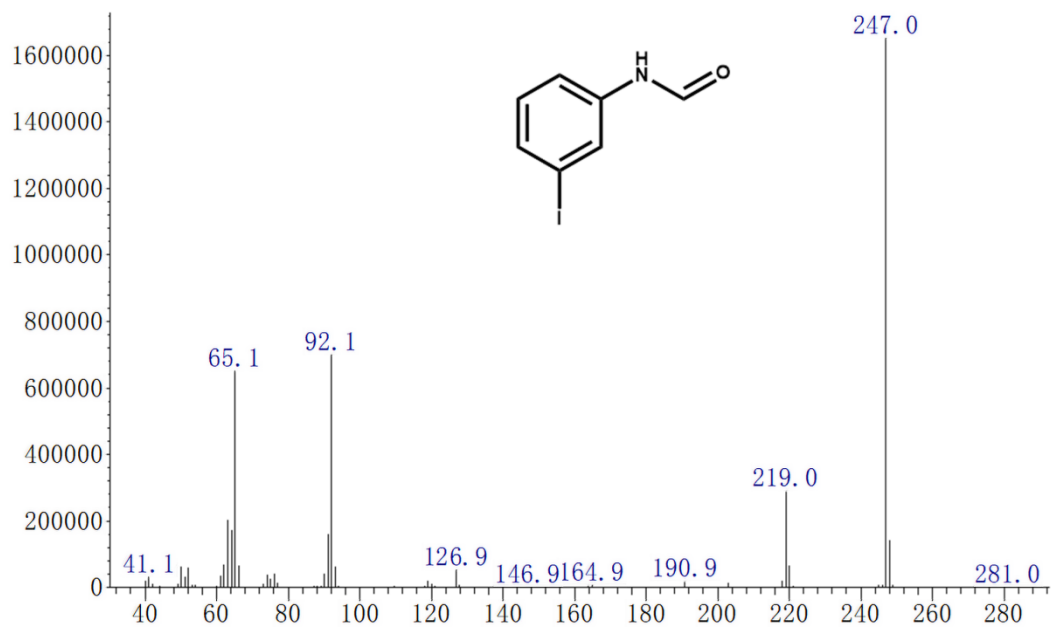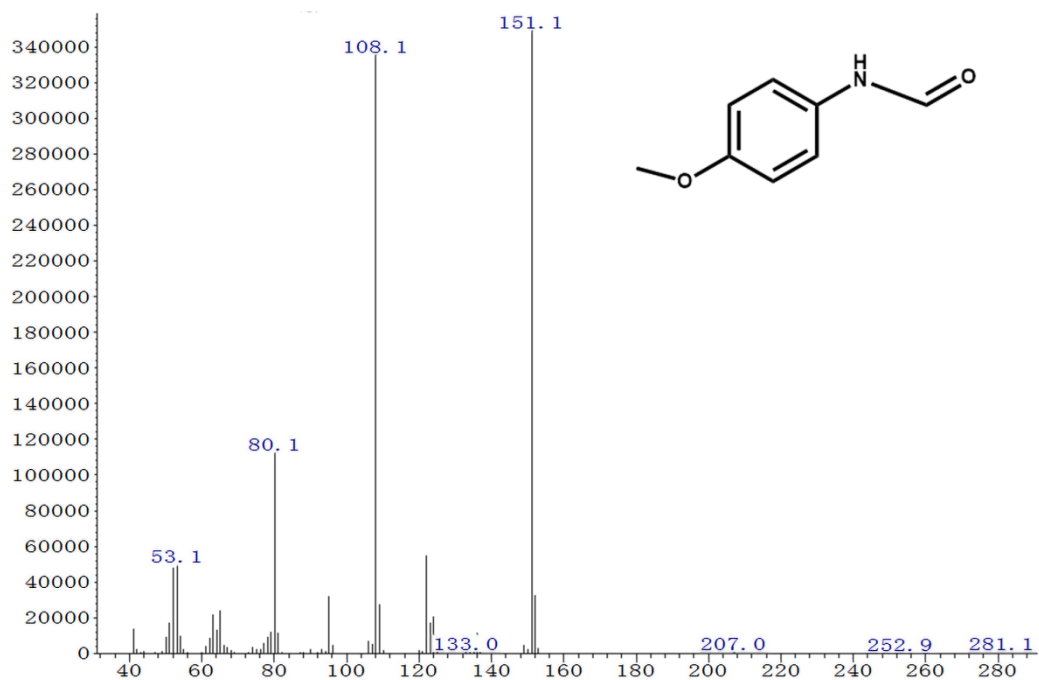

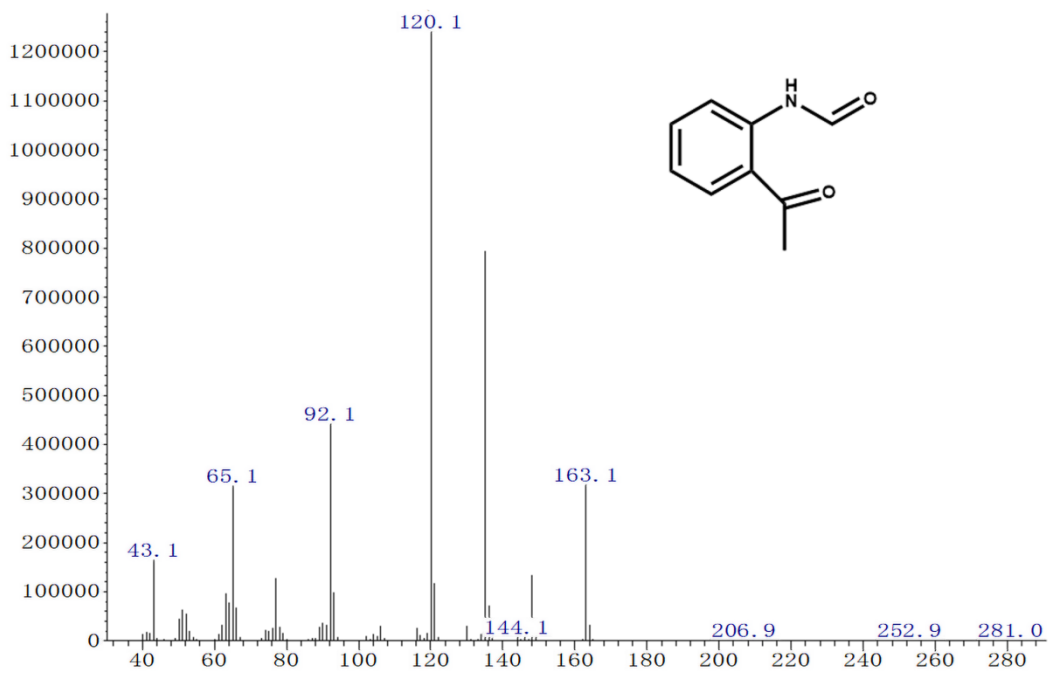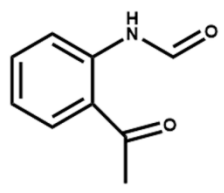

Supplement: d3nj05864f1.pdf [file d3nj05864f1.pdf]
